# Supplementary material for: Synthesis of CdS-loaded (CuC10H26N6)3(PW12O40)2 for enhanced photocatalytic degradation of tetracycline under simulated solar light irradiation
Source: Royal Society of Chemistry journal article supplement (doi:10.1039/d0ra03755a), 2020-01-01
Supplement: d0ra03755a1.pdf [file d0ra03755a1.pdf]

Electronic Supplementary Material (ESI) for RSC Advance  
This journal is © The Royal Society of Chemistry 2020

## Electronic Supplementary Information

# Synthesis of CdS-loaded $(\text{CuC}_{10}\text{H}_{26}\text{N}_6)_3(\text{PW}_{12}\text{O}_{40})_2$ for enhanced photocatalytic degradation of tetracycline under simulated solar light irradiation

Feng Li<sup>a, c</sup>, Zhuomin Qiang<sup>a</sup>, Shunqiang Chen<sup>a</sup>, Jianyu Wei<sup>b\*</sup>, Taohai Li<sup>a, c</sup>, Dabin Zhang<sup>d</sup>

---

*a College of Chemistry, Key Lab of Environment Friendly Chemistry and Application in Ministry of Education, Xiangtan University, Xiangtan, 411105, China.*

*b China Tobacco Guangxi Industrial Co., Ltd, Nanning, Guangxi 530001, PR China.  
E-mail: jtx\_wjy@163.com*

*c Nano and Molecular Systems Research Unit, Faculty of Science, University of Oulu, P.O. Box 3000, FIN-90014, Finland.*

*d School of Mechanical Engineering, Guizhou University, Guiyang, Guizhou 550025, PR China.*

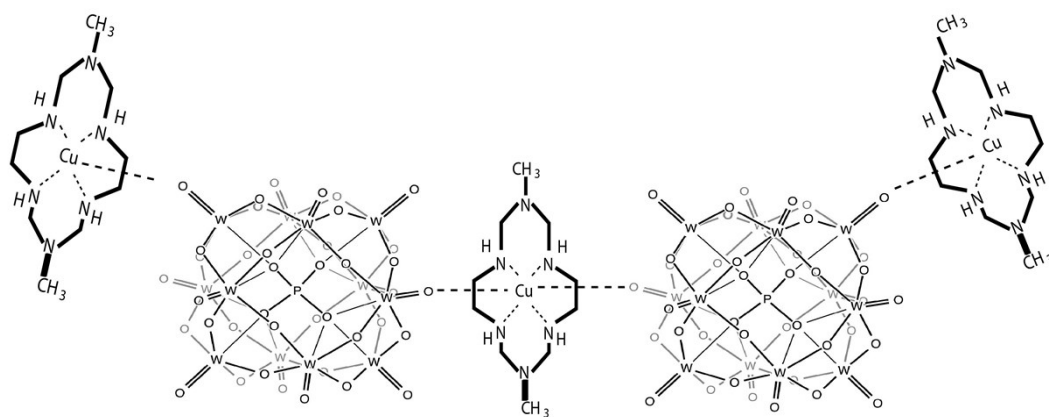

**Fig. S1.** The possible chemical structure of  $(\text{CuC}_{10}\text{H}_{26}\text{N}_6)_3(\text{PW}_{12}\text{O}_{40})_2$ .

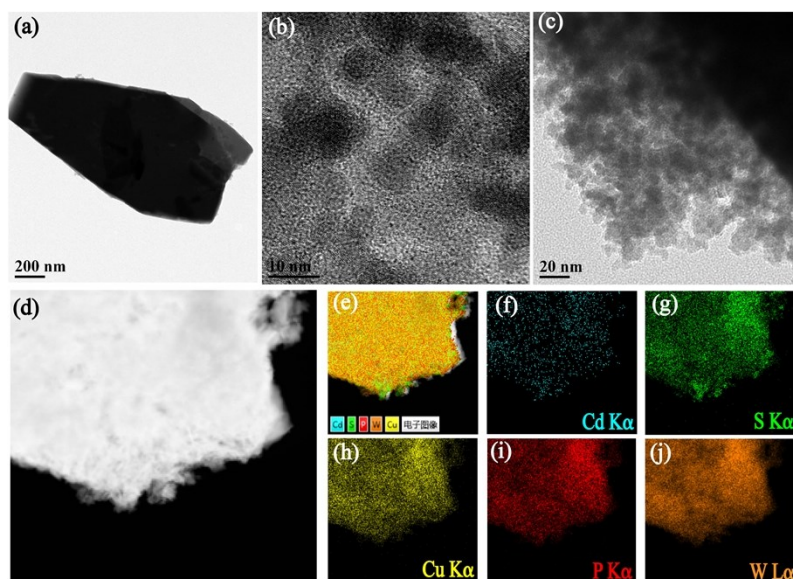

**Fig. S2.** TEM images of (a) CuPW, (b) CdS, (c) CuPW-CdS-15, (d) CuPW-CdS-10 and (e)-(j) the EDX mapping of CuPW-CdS-10.

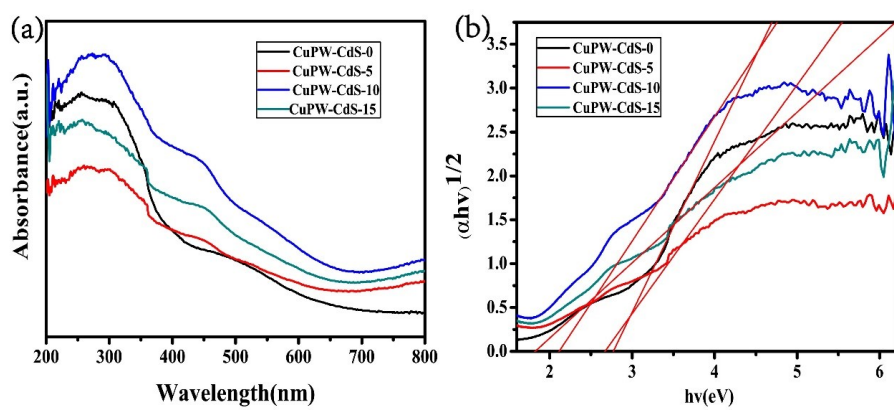

**Fig. S3.** (a) UV-vis DRS of CuPW-Cds samples. (b) Plot of transformed KM function vs.  $h\nu$  for the corresponding samples.

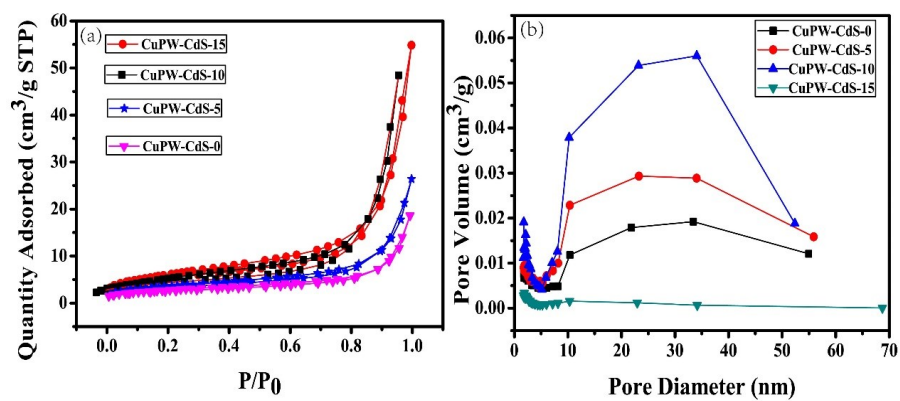

**Fig. S4.** (a)  $N_2$  adsorption-desorption isotherms and (b) pore size distribution of the obtained samples.

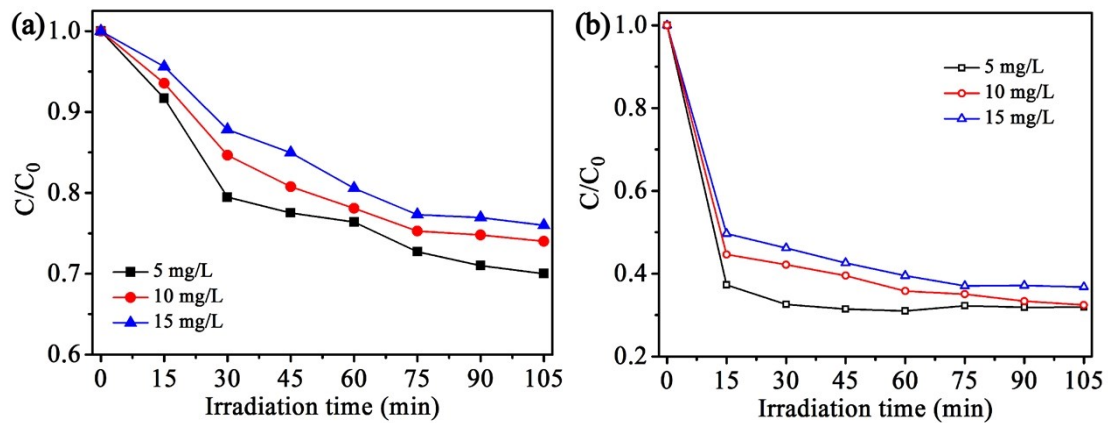

Fig. S5. Absorption ability evaluation of CuPW-CdS-10 for different (a) TC (b) RhB concentration in the dark condition.

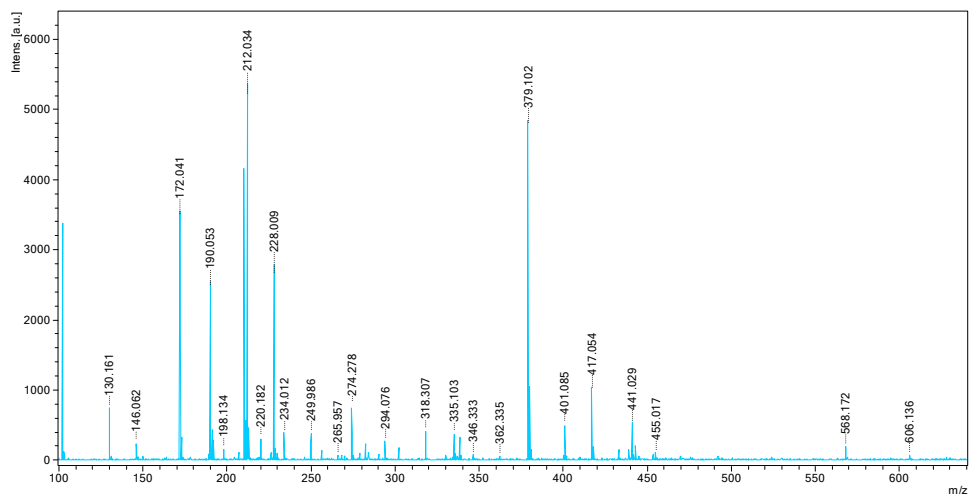

**Fig. S6.** MS of TC intermediation production.

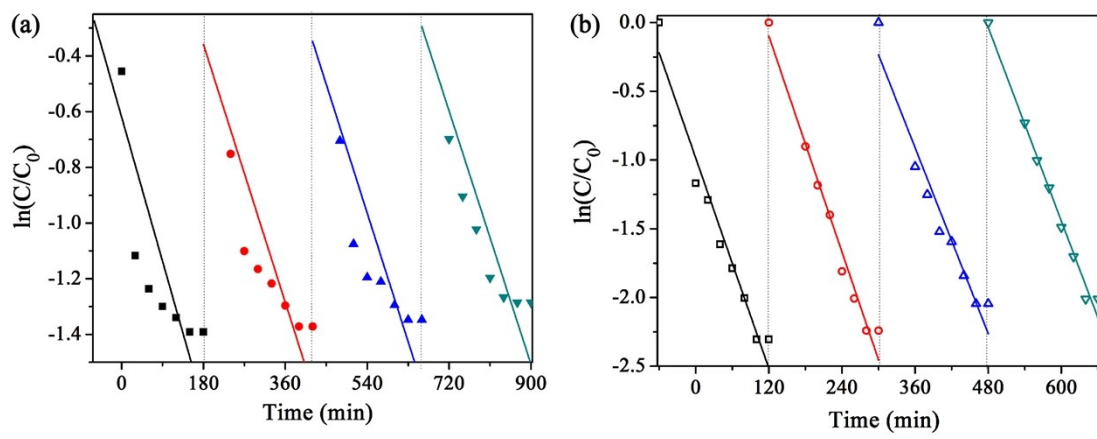

**Fig. S7.** First-order kinetics of (a) TC and (b) RhB with reusability tests.



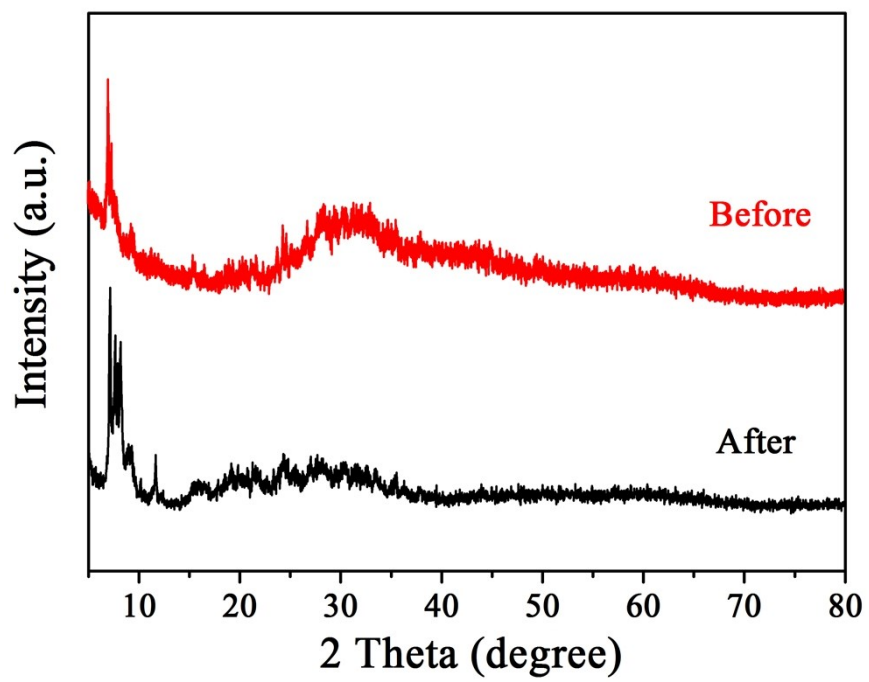

Fig. S8. XRD patterns of the fresh and used CuPW-CdS-10 composite.

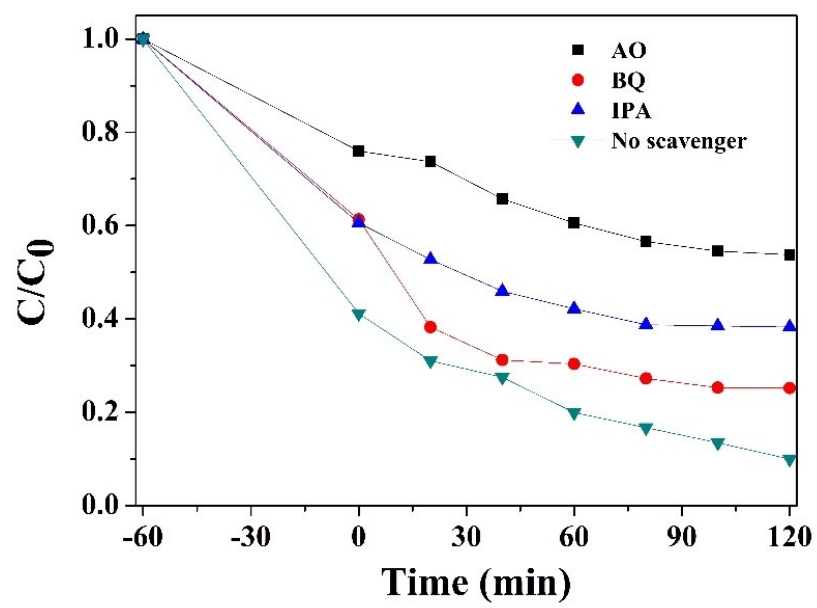

Fig. S9. Reactive specie trapping experiments of CuPW-CdS-10.

**Table S1.** The comparison of photocatalytic performance of different materials.

| <b>Materials</b>                                                                                                                  | <b>Synthetic method</b>                                 | <b>Photocatalytic degradation</b>         | <b>Reference</b> |
|-----------------------------------------------------------------------------------------------------------------------------------|---------------------------------------------------------|-------------------------------------------|------------------|
| CDs/g-C <sub>3</sub> N <sub>4</sub> /MoO <sub>3</sub> composites                                                                  | Hydrothermal and calcination method                     | 88.4% TC removed                          | [S1]             |
| g-C <sub>3</sub> N <sub>4</sub> /Ag/P3HT composites                                                                               | Two-step deposition technique                           | ~80% TC and ~95% MO removed               | [S2]             |
| Ag/g-C <sub>3</sub> N <sub>4</sub> plasmonic photocatalysts                                                                       | Thermal exfoliation strategy and photo-reduction method | ~83% TC removed                           | [S3]             |
| Modified red mud                                                                                                                  | Calcination treatment                                   | 88.4% TC removed                          | [S4]             |
| $\gamma$ -Bi <sub>2</sub> MoO <sub>6</sub> /Bi <sub>12</sub> GeO <sub>20</sub> heterostructure                                    | Heat treatment                                          | 77% TC and 97% MBT removed                | [S5]             |
| ZnO/g-C <sub>3</sub> N <sub>4</sub> nanocomposite                                                                                 | Thermal condensation and hydrothermal in situ growth    | 78.4% TC and 63.5% OTC removed            | [S6]             |
| (NGQDs)-BiVO <sub>4</sub> /g-C <sub>3</sub> N <sub>4</sub>                                                                        | Calcine and low temperature process                     | 91.5% TC, 72.4% CIP and 66.7% OTC removed | [S7]             |
| Hybrid BiOBr/UiO-66-NH <sub>2</sub> composite                                                                                     | Co-precipitation method                                 | 83% RhB removed                           | [S8]             |
| <b>CdS-loaded (CuC<sub>10</sub>H<sub>26</sub>N<sub>6</sub>)<sub>3</sub>(PW<sub>12</sub>O<sub>40</sub>)<sub>2</sub> composites</b> | <b>one-pot self-assembly process</b>                    | <b>79% TC and 91% RhB removed</b>         | <b>This work</b> |

Abbreviations: TC--Tetracycline; MO--Methyl Orange; MBT--2-Mercaptobenzothiazole; OTC--Oxytetracycline; CIP--Ciprofloxacin; RhB--Rhodamine B

**Table S2.** Specific surface area analysis and textural parameters of the samples.

| <b>Samples</b> | <b>S<sub>BET</sub> (m<sup>2</sup> g<sup>-1</sup>)</b> | <b>Pore Volume<br/>(cm<sup>3</sup>/g)</b> | <b>Pore Size (nm)</b> |
|----------------|-------------------------------------------------------|-------------------------------------------|-----------------------|
| CuPW-CdS-0     | 10.4532                                               | 0.029112                                  | 11.14009              |
| CuPW-CdS-5     | 13.0224                                               | 0.040793                                  | 12.53004              |
| CuPW-CdS-10    | 19.2756                                               | 0.075276                                  | 15.62093              |
| CuPW-CdS-15    | 22.2850                                               | 0.084863                                  | 15.23240              |

## Reference

- [S1] Z. J. Xie, Y. P. Feng, F. L. Wang, D. N. Chen, Q. X. Zhang, Y. Q. Zeng, W. Y. Lv and G. G. Liu, *Appl. Catal. B. Environ.*, 2018, **229**, 96-104.
- [S2] F. Liu, T. P. Nguyen, Q. Wang, F. Massuyeau, Y. Dan and L. Jiang, *Appl. Surf. Sci.*, 2019, **496**, 143653.
- [S3] W. C. Xu, S. F. Lai, S. C. Pillai, W. Chu, Y. Hu, X. D. Jiang, M. L. Fu, X. L. Wu, F. H. Li and H. L. Wang, *J. Colloid. Inter. Sci.*, 2020, **574**, 110-121.
- [S4] W. L. Shi, H. J. Ren, M. Y. Li, K. K. Shu, Y. S. Xu, C. Yan and Y. B. Tang, *Chem. Eng. J.*, 2019, **382**, 122876.
- [S5] X. W. Ruan, H. Hu, G. B. Che, P. J. Zhou, C. B. Liu and H. J. Dong, *Appl. Surf. Sci.*, 2020, **499**, 143668.
- [S6] J. Y. Hu, R. Yang, Z. H. Li, Y. Q. Sun, L. B. Qu and N. K. Alexander, *Solid State Sci.*, 2019, **92**, 60-67.
- [S7] M. Yan, F. F. Zhu, W. Gu, L. Sun, W. D. Shi and Y. Q. Hua, *RSC Adv.*, 2016, **66**, 61162-61174.
- [S8] B. Rehama, Q. H. Shen, L. F. Wei, D. D. Hao, N. X. Li and J. C. Zhou, *RSC Adv.*, 2018, **8**, 2048-2058.
